# Supplementary material for: Phenological mismatches between above- and below-ground plant responses to climate warming: a global synthesis
Source: Research Square preprint supplement (doi:10.21203/rs.3.rs-182603/v1), 2021-03-09

**Supporting information**

Phenological mismatches between above- and below-ground plant responses to climate warming: a global synthesis

Content:

**Table S1** Weighted effect size of different phenological parameters among herbaceous and woody plants.

**Table S2.** Egger’s regression and Fail-Safe Analysis were used to test the publication bias.

**Table S3** Literatures included in the dataset for the meta-analysis.

**Figure S1.** Article selection process using Preferred Reporting Items for Systematic Reviews (PRISMA) guidelines.

**Table S1** Weighted effect size of different phenological parameters among herbaceous and woody plants.

|  | **Estimate (CI)** | **N** | ***P*** |
| --- | --- | --- | --- |
| ***Herbaceous plants*** |  |  |  |
| Start of above-ground growing season | -2.88 (-1.85~-3.91) | 112 | <0.001 |
| End of above-ground growing season | -5.06 (-2.85~-7.26) | 112 | <0.001 |
| Length of above-ground growing season | -2.18 (-0.46~-3.91) | 112 | <0.05 |
| Start of below-ground growing season | -0.41 (-2.78~1.96) | 56 | 0.74 |
| End of below-ground growing season | -0.66 (-3.46~2.15) | 56 | 0.65 |
| Length of below-ground growing season | -0.25 (-3.60~3.10) | 56 | 0.88 |
| ***Woody plants*** |  |  |  |
| Start of above-ground growing season | -2.11 (-0.34~-3.88) | 70 | <0.05 |
| End of above-ground growing season | -1.01 (-3.24~1.22) | 70 | 0.38 |
| Length of above-ground growing season | 1.10 (-0.99~3.20) | 70 | 0.30 |
| Start of below-ground growing season | -6.47 (-2.36~-10.58) | 34 | <0.01 |
| End of below-ground growing season | 2.26 (-4.20~8.73) | 34 | <0.02 |
| Length of below-ground growing season | 8.73 (2.20~15.27) | 34 | <0.01 |

**Table S2** Egger's regression test was used to identify publication bias, *P* <0.05 suggests the presence of publication bias. If the publication bias exist, Rosenberg fail-safe number was further used to test whether our conclusion was likely to be affected by the nonpublished studies. When the Rosenberg fail-safe number was larger than 5N +10 (N the numbers of the observations), it indicated that the conclusion in our study was not affected by the nonpublished studies.

|  | *P* value for Egger's regression test | Rosenberg fail-safe number | 5N+10 |
| --- | --- | --- | --- |
| ***Herbaceous plants*** |  |  |  |
| Start of above-ground growing season | 0.14 | - | 570 |
| End of above-ground growing season | 0.24 | - | 570 |
| Length of above-ground growing season | 0.01 | 6708 | 570 |
| Start of below-ground growing season | 0.94 | - | 290 |
| End of below-ground growing season | 0.18 | - | 290 |
| Length of below-ground growing season | 0.29 | - | 290 |
| ***Woody plants*** |  |  |  |
| Start of above-ground growing season | <0.01 | 4041 | 360 |
| End of above-ground growing season | <0.001 | 19753 | 360 |
| Length of above-ground growing season | <0.01 | 41916 | 360 |
| Start of below-ground growing season | 0.80 | - | 180 |
| End of below-ground growing season | 0.69 | - | 180 |
| Length of below-ground growing season | 0.82 | - | 180 |

**Table S3** Literatures included in the dataset for the meta-analysis.

**Adams SR, Cockshull KE, Cave CRJ. 2001.** Effect of temperature on the growth and development of tomato fruits. *Annals of Botany* **88**(5): 869-877.

**Arndal MF, Tolver A, Larsen KS, Beier C, Schmidt IK. 2018.** Fine root growth and vertical distribution in response to elevated CO2, warming and drought in a mixed heathland–Grassland. *Ecosystems* 2018(21): 15-30.

**Bai W, Wan S, Niu S, Liu W, Chen Q, Wang Q, Zhang W, Han X, Li L. 2010.** Increased temperature and precipitation interact to affect root production, mortality, and turnover in a temperate steppe: implications for ecosystem C cycling. *Global Change Biology* **16**(4): 1306-1316.

**Bannayan M, Soler CMT, Garcia AGY, Guerra LC, Hoogenboom G. 2009.** Interactive effects of elevated CO2 and temperature on growth and development of a short- and long-season peanut cultivar. *Climatic Change* **93**: 389-406.

**Benlloch-González M, Quintero JM, Suarez MP, Sánchez-Lucas R, Fernández-Escobar R, Benlloch M. 2016.** Effect of moderate high temperature on the vegetative growth and potassium allocation in olive plants. *Journal of Plant Physiology* **207**: 22-29.

**Bronson DR, Gower ST, Tanner M, Van Herk I. 2009.** Effect of ecosystem warming on boreal black spruce bud burst and shoot growth. *Global Change Biology* **15**(6): 1534-1543.

**Carrillo Y, Dijkstra FA, Dan LC, Morgan JA, Blumenthal D, Waldron S, Pendall E. 2014.** Disentangling root responses to climate change in a semiarid grassland. *Oecologia* **175**(2): 699.

**Coleman JS, Bazzaz FA. 1992.** Effects of CO2 and temperature on growth and resource use of co‐occurring C3 and C4 annuals. *Ecology* **73**(4): 1244-1259.

**D’Imperio, L., Arndal, M.F., Nielsen, C.S., Elberling, B. & Schmidt, I.K.** (2018) Fast responses of root dynamics to increased snow deposition and summer air temperature in an arctic wetland. *Frontiers in Plant Science*, **9**, 1258.

**Darrouzet‐Nardi, A., Steltzer, H., Sullivan, P.F., Segal, A., Koltz, A.M., Livensperger, C., Schimel, J.P. & Weintraub, M.N.** (2019) Limited effects of early snowmelt on plants, decomposers, and soil nutrients in Arctic tundra soils. *Ecology & Evolution*, **9**, 1820-1844.

**Edwards EJ, Benham DGMarland LA, Fitter AH. 2004.** Root production is determined by radiation flux in a temperate grassland community. *Global Change Biology* **10**(2): 209-227.

**Esmail S, Oelbermann M. 2011.** The impact of climate change on the growth of tropical agroforestry tree seedlings. *Agroforestry Systems* **83**(2): 235-244.

**Feng J, Xiong D, Deng F, Shi S, Xu S, Zhong B, Chen Y, Chen G. 2017.** Effects of soil warming and precipitation exclusion and their interaction on fine roots production of Chinese fir (*Cunninghamia lanceolata*) seedlings. *Acta Ecologica Sinica* **37**(4) 1119-1126.

**Fitter AH, Self GK, Brown TK, Bogie DS, Graves JD, Benham D, Ineson P. 1999.** Root production and turnover in an upland grassland subjected to artificial soil warming respond to radiation flux and nutrients, not temperature. *Oecologia* **120**(4): 575-581.

**Forbes PJ, Black KE, Hooker JE. 1997.** Temperature-induced alteration to root longevity in *Lolium perenne*. *Plant & Soil* **190**(1): 87-90.

**Forbes, S.J., Cernusak, L.A., Northfield, T.D., Gleadow, R.M., Lambert, S. & Cheesman, A.W.** (2020) Elevated temperature and carbon dioxide alter resource allocation to growth, storage and defence in cassava (Manihot esculenta). *Environmental & Experimental Botany*, 103997.

**Gavito ME, Curtis PS, Mikkelsen TN, Jakobsen I. 2001.** Interactive effects of soil temperature, atmospheric carbon dioxide and soil N on root development, biomass and nutrient uptake of winter wheat during vegetative growth. *Journal of Experimental Botany* **52**(362): 1913-1923.

**Ge ZM, Zhou X, Kellomäki S, Peltola H, Biasi C, Shurpali N, Martikainen PJ, Wang KY. 2012.** Measured and modeled biomass growth in relation to photosynthesis acclimation of a bioenergy crop (Reed canary grass) under elevated temperature, CO2 enrichment and different water regimes. *Biomass & Bioenergy* **46**(46): 251-262.

**Gruber A, Oberhuber W, Wieser G. 2018.** Nitrogen addition and understory removal but not soil warming increased radial growth of *Pinus cembra* at treeline in the Central Austrian Alps. *Frontiers in Plant Science* **9**: 1-11.

**Hakala, K. & Mela, T.** (1996) The effects of prolonged exposure to elevated temperatures and elevated CO2 levels on the growth, yield and dry matter partitioning of field-sown meadow fescue. *Agricultural &* Food *Science*, **5**, 285-298.

**Han S, Lee SJ, Yoon TK, Han SH, Lee J, Kim S, Hwang J, Cho MS, Son YW. 2015.** Species-specific growth and photosynthetic responses of first-year seedlingsof four coniferous species to open-field experimental warming. *Turkish Journal of Agriculture and Forestry* **39**(2): 342-349.

**Hely, S.E. & Roxburgh, S.H.** (2005) The interactive effects of elevated CO2, temperature and initial size on growth and competition between a native C3 and an invasive C3 grass. *Plant Ecology*, **177**, 85-98.

**Higuchi H, Sakuratani T, Utsunomiya N. 1999.** Photosynthesis, leaf morphology, and shoot growth as affected by temperatures in cherimoya (*Annona cherimola* Mill.) trees. *Scientia Horticulturae* **80**(1): 91-104.

**Huang BR, Taylor HM, Mcmichael BL. 1991.** Behavior of lateral roots in winter wheat as affected by temperature. *Environmental & Experimental Botany* **31**(2): 187–192.

**Hutchison JS, Henry HAL. 2010.** Additive effects of warming and increased nitrogen deposition in a temperate old field: plant productivity and the importance of winter. *Ecosystems* **13**(5): 661-672.

**Johnson MG, Rygiewicz PT, Tingey DT, Phillips DL. 2010.** Elevated CO2 and elevated temperature have no effect on Douglas-fir fine-root dynamics in nitrogen-poor soil. *New Phytologist* **170**(2): 345-356.

**Kellomäki, S. & Wang, K.-Y.** (2001) Growth and resource use of birch seedlings under elevated carbon dioxide and temperature. *Annals of Botany*, **87**, 669-682.

**King J, Pregitzer K, Zak D. 1999.** Clonal variation in above- and below-ground growth responses of *Populus tremuloides* Michaux: Influence of soil warming and nutrient availability. *Plant & Soil* **217**(1/2): 119-130.

**Klein JA, Harte J, Zhao X-Q. 2007.** Experimental warming, not grazing, decreases rangeland quality on the Tibetan Plateau. *Ecological Applications* **17**(2): 541-557.

**Kreyling, J., Grant, K., Hammerl, V., Arfin-Khan, M.A., Malyshev, A.V., Peñuelas, J., Pritsch, K., Sardans, J., Schloter, M. & Schuerings, J.** (2019) Winter warming is ecologically more relevant than summer warming in a cool-temperate grassland. *Scientific Reports*, **9**, 1-9.

**Lahti M, Aphalo PJ, Finer L, Ryyppo A, Lehto T, Mannerkoski H. 2005.** Effects of soil temperature on shoot and root growth and nutrient uptake of 5-year-old Norway spruce seedlings. *Tree Physiology* **25**(1): 115-122.

**Lee JS. 2011.** Combined effect of elevated CO2 and temperature on the growth and phenology of two annual C3 and C4 weedy species. *Agriculture Ecosystems & Environment* **140**(3): 484-491.

**Lenka, N.K., Lenka, S., Thakur, J., Elanchezhian, R., Aher, S., Simaiya, V., Yashona, D., Biswas, A., Agrawal, P. & Patra, A.** (2017) Interactive effect of elevated carbon dioxide and elevated temperature on growth and yield of soybean. *Current Science*, **113**, 2305.

**Leppälammi-Kujansuu, J., Salemaa, M., Kleja, D.B., Linder, S. & Helmisaari, H.-S.** (2014) Fine root turnover and litter production of Norway spruce in a long-term temperature and nutrient manipulation experiment. *Plant & Soil*, **374**, 73-88.

**Li, Y., Hou, R. & Tao, F.** (2020) Interactive effects of different warming levels and tillage managements on winter wheat growth, physiological processes, grain yield and quality in the North China Plain. *Agriculture, Ecosystems & Environment*, **295**, 106923.

**Lin X, Zhang Z, Wang S, Hu Y, Xu G, Luo C, Chang X, Duan J, Lin Q, Xu B. 2011.** Response of ecosystem respiration to warming and grazing during the growing seasons in the alpine meadow on the Tibetan plateau. *Agricultural & Forest Meteorology* **151**(7): 792-802.

**Mitchell Rac, Mitchell Vj, Driscoll Sp, Franklin J, Lawlor Dw. 1993.** Effects of increased CO2 concentration and temperature on growth and yield of winter wheat at two levels of nitrogen application. *Plant, Cell & Environment* **16**(5): 521-529.

**Nissinen K, Nybakken L, Virjamo V, Julkunentiitto R. 2016.** Slow-growing Salix repens (*Salicaceae*) benefits from changing climate. *Environmental and Experimental Botany* **128**: 59-68.

**Nybakken L, Hörkkä R, Julkunen-Tiitto R. 2012.** Combined enhancements of temperature and UVB influence growth and phenolics in clones of the sexually dimorphic *Salix myrsinifolia*. *Physiologia Plantarum* **145**(4): 551-564.

**Oh-e I, Saitoh K, Kuroda T. 2007.** Effects of high temperature on growth, yield and dry-matter production of rice grown in the paddy field. *Plant Production Science* **10**(4): 412-422.

**Peltola H, Kilpeläinen A, Kellomäki S. 2002.** Diameter growth of Scots pine (*Pinus sylvestris*) trees grown at elevated temperature and carbon dioxide concentration under boreal conditions. *Tree Physiology* **22**(14): 963-972.

**Pilon R, Picon-Cochard C, Bloor JMG, Revaillot S, Kuhn E, Falcimagne R, Balandier P, Soussana J-F. 2013.** Grassland root demography responses to multiple climate change drivers depend on root morphology. *Plant and Soil* **364**(1): 395-408.

**Pilumwong J, Senthong C, Srichuwong S, Ingram KT. 2007.** Effects of temperature and elevated CO2 on shoot and root growth of peanut (*Arachis hypogaea L.*) grown in controlled environment chambers. *Scienceasia* **33**(1): 79-87.

**Radville L, Post E, Eissenstat DM. 2018.** On the sensitivity of root and leaf phenology to warming in the Arctic. *Arctic Antarctic & Alpine Research* **50**(1): S100020.

**Randriamanana, T.R., Lavola, A. & Julkunen-Tiitto, R.** (2015) Interactive effects of supplemental UV-B and temperature in European aspen seedlings: Implications for growth, leaf traits, phenolic defense and associated organisms. *Plant Physiology & Biochemistry*, **93**, 84-93.

**Reddy KR, Hodges HF, Mckinion JM, Wall GW. 1991.** Temperature effects on pima cotton growth and development. *Agronomy Journal* **84**(2): 237-243.

**Schuerings J, Jentsch A, Walter J, Kreyling J. 2014.** Winter warming pulses differently affect plant performance in temperate heathland and grassland communities. *Ecological Research* **29**(4): 561-570.

**Sheppard CS, Stanley MC. 1939.** Does elevated temperature and doubled CO2 increase growth of three potentially invasive plants? *Invasive Plant Science & Management* **7**(2): 237-246.

**Shi SZ, Xiong DC, Deng F, Feng JX, Chen-Sen XU, Zhong BY, Chen YY, Chen GS, Yang YS. 2017.** Interactive effects of soil warming and nitrogen addition on fine root production of Chinese fir seedlings. *Chinese Journal of Plant Ecology* **41**(2): 186-195.

**Slaney, M., Wallin, G., Medhurst, J. & Linder, S.** (2007) Impact of elevated carbon dioxide concentration and temperature on bud burst and shoot growth of boreal Norway spruce. *Tree Physiology*, **27**, 301-312.

**Sobuj N, Virjamo V, Zhang Y, Nybakken L, Julkunentiitto R. 2018.** Impacts of elevated temperature and CO2 concentration on growth and phenolics in the sexually dimorphic *Populus tremula* (L.). *Environmental and Experimental Botany* **146**: 34-44.

**Sønsteby A, Heide OM. 2012.** Effects of photoperiod and temperature on growth, flowering and fruit yield in annual-fruiting red raspberry cultivars (*Rubus idaeus L.*). *European Journal of Horticultural Science* **77**(3): 97-108.

**Stenström A, Jónsdóttir IS. 2010.** Responses of the clonal sedge, Carex bigelowii, to two seasons of simulated climate change. *Global Change Biology* **3**(S1): 89-96.

**Stirling CCM, Jones ML, Ashenden TW, Sparks TH. 2010.** Effects of elevated CO2 and temperature on growth and allometry of five native fast-growing annual species. *New Phytologist* **140**(2): 343-354.

**Sullivan, P.F. & Welker, J.M.** (2005) Warming chambers stimulate early season growth of an arctic sedge: results of a minirhizotron field study. *Oecologia*, **142**, 616-626.

**Tacarindua CRP, Shiraiwa T, Homma K, Kumagai E, Sameshima R. 2013.** The effects of increased temperature on crop growth and yield of soybean grown in a temperature gradient chamber. *Field Crops Research* **154**(3): 74-81.

**Takahashi K. 2005.** Effects of artificial warming on shoot elongation of alpine dwarf pine (*pinus pumila*) on mount shogigashira, central Japan. *Arctic Antarctic & Alpine Research* **37**(4): 620-625.

**Usami T, Lee JT. 2010.** Interactive effects of increased temperature and CO2 on the growth of Quercus *myrsinaefolia* saplings. *Plant Cell & Environment* **24**(10): 1007-1019.

**Veteli TKK, Julkunen-Tiitto R, Roininen H, Tahvanainen J. 2010.** Effects of elevated CO2 and temperature on plant growth and herbivore defensive chemistry. *Global Change Biology* **8**(12): 1240-1252.

**Volder A, Gifford RM, Evans JR. 2015.** Effects of elevated atmospheric CO2 concentrations, clipping regimen and differential day/night atmospheric warming on tissue nitrogen concentrations of a perennial pasture grass. *Global Change Biology* **7**: plv094.

**Walker, T.N., Ward, S.E., Ostle, N.J. & Bardgett, R.D.** (2015) Contrasting growth responses of dominant peatland plants to warming and vegetation composition. *Oecologia*, **178**, 141-151.

**Wan SQ, Norby RJPregitzer KS, Ledford J, O'Neill EG. 2004.** CO2 enrichment and warming of the atmosphere enhance both productivity and mortality of maple tree fine roots. *New Phytologist* **162**(2): 437-446.

**Wang, C., Zhao, X., Zi, H., Hu, L., Ade, L., Wang, G. & Lerdau, M.** (2017) The effect of simulated warming on root dynamics and soil microbial community in an alpine meadow of the Qinghai-Tibet Plateau. *Applied Soil Ecology*, **116**, 30-41.

**Wang, J.-F., Gao, S., Lin, J.-X., Mu, Y.-G. & Mu, C.-S.** (2010) Summer warming effects on biomass production and clonal growth of Leymus chinensis. *Crop & Pasture Science*, **61**, 670-676.

**Wang, Z., Ding, L., Wang, J., Zuo, X., Yao, S. & Feng, J.** (2016) Effects of root diameter, branch order, root depth, season and warming on root longevity in an alpine meadow. *Ecological Research*, **31**, 739-747.

**Wheeler JA, Gonzalez NM, Stinson KA. 2016.** Red hot maples: Acer rubrum first-year phenology and growth responses. *Canadian Journal of Forest Research* **47**(2): 159-165.

**Wu, Y., Zhu, B., Eissenstat, D.M., Wang, S., Tang, Y. & Cui, X**. (2020) Warming and grazing interact to affect root dynamics in an alpine meadow. *Plant & Soil*, 1-16.

**Xiong D. 2018.** Interactive effects of warming and nitrogen addition on fine root dynamics of a young subtropical plantation. *Soil Biology and Biochemistry* **123**: 180-189.

**Xu MH, Peng F, You QG, Guo J, Tian XF, Liu M, Xue X. 2015.** Effects of warming and clipping on plant and soil properties of an alpine meadow in the Qinghai-Tibetan Plateau, China. *Journal of Arid Land* **7**(2): 189-204.

**Xu, Z., Hu, T., Zhang, L., Zhang, Y., Xian, J. & Wang, K.** (2009) Effects of simulated warming on the growth, leaf phenology, and leaf traits of Salix eriostachya in sub-alpine timberline ecotone of western Sichuan, China. *The Journal of Applied Ecology*, **20**, 7-12.

**Yoon STH, Gerrit, Flitcroft I, Bannayan M. 2009.** Growth and development of cotton (Gossypium hirsutum L.) in response to CO2 enrichment under two different temperature regimes. *Environmental & Experimental Botany* **67**(1): 178-187.

**Yoshitake S, Tabei N, Mizuno Y, Yoshida H, Sekine Y, Tatsumura M, Koizumi H. 2015.** Soil microbial response to experimental warming in cool temperate semi‐natural grassland in Japan. *Ecological Research* **30**(2): 235-245.

**Yun-Lu, T., Jin, C., Ai-Xing, D., Jian-Chu, Z. & Wei-Jian, Z.** (2011) Effects of asymmetric warming on the growth characteristics and yield components of winter wheat under free air temperature increased. *The Journal of Applied Ecology*, **22**, 681-686.

**Zha T, ., Ryyppö A, ., Wang KY, KellomäKi S, . 2001.** Effects of elevated carbon dioxide concentration and temperature on needle growth, respiration and carbohydrate status in field-grown Scots pines during the needle expansion period. *Tree Physiology* **21**(17): 1279-1287.

**Zhang, L., Zhong, B., Chen, T., Xiong, D., Yan, X. & Chen, G.** (2020) Effects of air and soil warming on aboveground phenology and growth of Cunninghamia lanceolata seedlings. *Acta Ecologica Sinica*. 40, 4146-4156.

**Figure S1** Article selection process using Preferred Reporting Items for Systematic Reviews (PRISMA) guidelines.


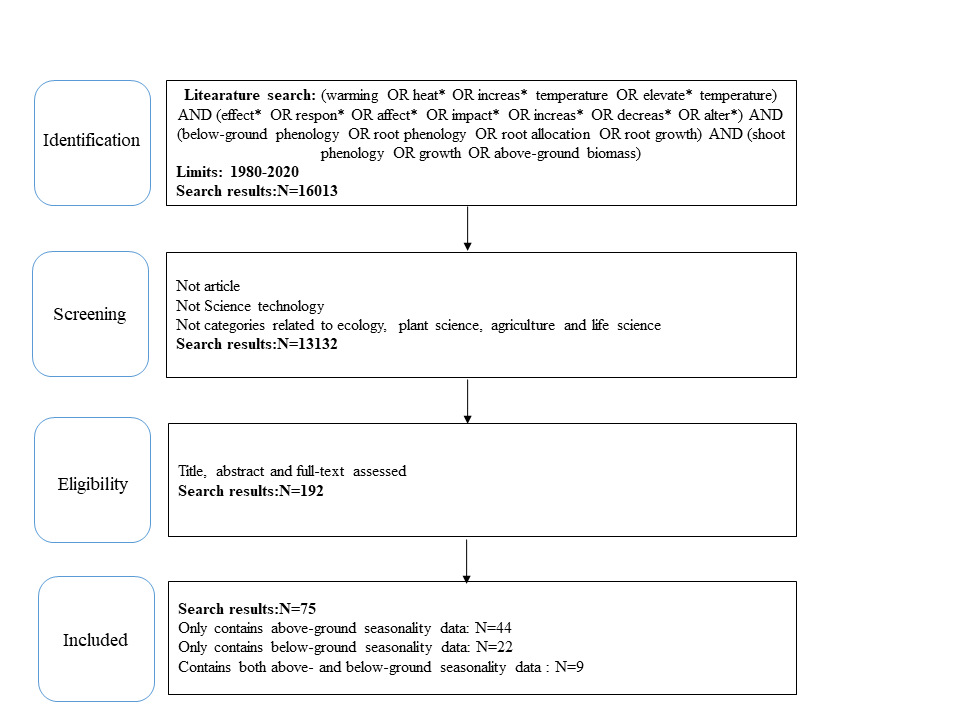

Supplement: Supplementary file 1 [file 240fe4930fe69e5ee5c61515.docx]
