# Supplementary material for: Phenological mismatches between above- and below-ground plant responses to climate warming: a global synthesis
Source: Research Square preprint supplement (doi:10.21203/rs.3.rs-182603/v1), 2021-03-09
Supplement: Supplementary file 1 [file d2afed948337882010c113c4.pdf]

## Supporting information

### Phenological mismatches between above- and below-ground plant responses to climate warming: a global synthesis

Content:

**Table S1** Weighted effect size of different phenological parameters among herbaceous and woody plants.

**Table S2.** Egger's regression and Fail-Safe Analysis were used to test the publication bias.

**Table S3** Literatures included in the dataset for the meta-analysis.

**Figure S1.** Article selection process using Preferred Reporting Items for Systematic Reviews (PRISMA) guidelines.

15 **Table S1** Weighted effect size of different phenological parameters among  
 16 herbaceous and woody plants.

17

|                                       | Estimate (CI)        | N   | P      |
|---------------------------------------|----------------------|-----|--------|
| <b><i>Herbaceous plants</i></b>       |                      |     |        |
| Start of above-ground growing season  | -2.88 (-1.85~-3.91)  | 112 | <0.001 |
| End of above-ground growing season    | -5.06 (-2.85~-7.26)  | 112 | <0.001 |
| Length of above-ground growing season | -2.18 (-0.46~-3.91)  | 112 | <0.05  |
| Start of below-ground growing season  | -0.41 (-2.78~1.96)   | 56  | 0.74   |
| End of below-ground growing season    | -0.66 (-3.46~2.15)   | 56  | 0.65   |
| Length of below-ground growing season | -0.25 (-3.60~3.10)   | 56  | 0.88   |
| <b><i>Woody plants</i></b>            |                      |     |        |
| Start of above-ground growing season  | -2.11 (-0.34~-3.88)  | 70  | <0.05  |
| End of above-ground growing season    | -1.01 (-3.24~1.22)   | 70  | 0.38   |
| Length of above-ground growing season | 1.10 (-0.99~3.20)    | 70  | 0.30   |
| Start of below-ground growing season  | -6.47 (-2.36~-10.58) | 34  | <0.01  |
| End of below-ground growing season    | 2.26 (-4.20~8.73)    | 34  | <0.02  |
| Length of below-ground growing season | 8.73 (2.20~15.27)    | 34  | <0.01  |

18

19

20

21

22 **Table S2** Egger's regression test was used to identify publication bias,  $P < 0.05$  suggests  
 23 the presence of publication bias. If the publication bias exist, Rosenberg fail-safe  
 24 number was further used to test whether our conclusion was likely to be affected by the  
 25 nonpublished studies. When the Rosenberg fail-safe number was larger than  $5N + 10$  ( $N$   
 26 the numbers of the observations), it indicated that the conclusion in our study was not  
 27 affected by the nonpublished studies.

|                                       | <i>P</i> value for Egger's<br>regression test | Rosenberg<br>fail-safe<br>number | $5N+10$ |
|---------------------------------------|-----------------------------------------------|----------------------------------|---------|
| <b><i>Herbaceous plants</i></b>       |                                               |                                  |         |
| Start of above-ground growing season  | 0.14                                          | -                                | 570     |
| End of above-ground growing season    | 0.24                                          | -                                | 570     |
| Length of above-ground growing season | 0.01                                          | 6708                             | 570     |
| Start of below-ground growing season  | 0.94                                          | -                                | 290     |
| End of below-ground growing season    | 0.18                                          | -                                | 290     |
| Length of below-ground growing season | 0.29                                          | -                                | 290     |
| <b><i>Woody plants</i></b>            |                                               |                                  |         |
| Start of above-ground growing season  | <0.01                                         | 4041                             | 360     |
| End of above-ground growing season    | <0.001                                        | 19753                            | 360     |
| Length of above-ground growing season | <0.01                                         | 41916                            | 360     |
| Start of below-ground growing season  | 0.80                                          | -                                | 180     |
| End of below-ground growing season    | 0.69                                          | -                                | 180     |
| Length of below-ground growing season | 0.82                                          | -                                | 180     |

28

29

30 **Table S3** Literatures included in the dataset for the meta-analysis.

| <b>References</b>                | <b>Aboveground phenophases</b> | <b>Belowground phenophases</b> |
|----------------------------------|--------------------------------|--------------------------------|
| Adams et al. 2001                | Yes                            |                                |
| Arndal et al. 2018               |                                | Yes                            |
| Bai et al. 2010                  |                                | Yes                            |
| Bannayan et al. 2009             | Yes                            |                                |
| Benloch-González et al. 2016     | Yes                            |                                |
| Bronson et al. 2009              | Yes                            |                                |
| Carrillo et al. 2014             |                                | Yes                            |
| Coleman and Bazzaz 1992          | Yes                            |                                |
| D'Imperio et al. 2018            |                                | Yes                            |
| Darrouzet-Nardi et al. 2019      |                                | Yes                            |
| Edwards et al. 2004              |                                | Yes                            |
| Esmail and Oelbermann 2011       | Yes                            |                                |
| Feng et al. 2017                 |                                | Yes                            |
| Fitter et al. 1999               |                                | Yes                            |
| Forbes et al. 1997               |                                | Yes                            |
| Forbes et al. 2020               | Yes                            |                                |
| Gavito et al. 2001               |                                | Yes                            |
| Ge et al. 2012                   | Yes                            | Yes                            |
| Gruber et al. 2018               | Yes                            |                                |
| Hakala and Mela 1996             | Yes                            |                                |
| Han et al. 2015                  | Yes                            | Yes                            |
| Hely and Roxburgh 2005           | Yes                            |                                |
| Higuchi et al. 1999              | Yes                            |                                |
| Huang et al. 1991                |                                | Yes                            |
| Hutchison and Henry 2010         | Yes                            |                                |
| Johnson et al. 2010              |                                | Yes                            |
| Kellomäki and Wang 2001          | Yes                            | Yes                            |
| King et al. 1999                 |                                | Yes                            |
| Klein et al. 2007                | Yes                            |                                |
| Kreyling et al. 2019             |                                | Yes                            |
| Lahti et al. 2005                | Yes                            | Yes                            |
| Lee et al. 2011                  | Yes                            |                                |
| Lenka et al. 2017                | Yes                            |                                |
| Leppälammii-Kujansuu et al. 2014 |                                | Yes                            |
| Li et al. 2020                   | Yes                            |                                |
| Lin et al. 2011                  | Yes                            |                                |
| Mitchell et al. 1993             | Yes                            |                                |
| Nissinen et al. 2016             | Yes                            |                                |
| Nybakken et al. 2012             | Yes                            |                                |
| Oh-e et al. 2007                 | Yes                            |                                |

|                           |     |     |
|---------------------------|-----|-----|
| Peltola et al. 2002       | Yes |     |
| Pilon et al. 2013         |     | Yes |
| Pilumwong et al. 2007     | Yes | Yes |
| Radville et al. 2018      | Yes | Yes |
| Randriamanana et al. 2015 | Yes |     |
| Reddy et al. 1991         | Yes |     |
| Schuerings et al. 2014    |     | Yes |
| Sheppard and Stanley 2014 | Yes |     |
| Shi et al. 2017           |     | Yes |
| Slaney et al. 2007        | Yes |     |
| Sobuj et al. 2018         | Yes |     |
| Sønsteby et al. 2012      | Yes |     |
| Stenström et al. 2010     | Yes |     |
| Stirling et al. 2010      | Yes |     |
| Sullivan and Welker 2005  | Yes | Yes |
| Tacarindua et al. 2013    | Yes |     |
| Takahashi 2005            | Yes |     |
| Tian et al. 211           | Yes |     |
| Usami and Lee 2010        | Yes |     |
| Veteli et al. 2010        | Yes |     |
| Volder et al. 2015        | Yes |     |
| Walker et al. 2015        | Yes |     |
| Wan et al. 2004           |     | Yes |
| Wang et al. 2017          |     | Yes |
| Wang et al. 2010          | Yes |     |
| Wang et al. 2016          |     | Yes |
| Wheeler et al. 2016       | Yes |     |
| Wu et al. 2020            |     | Yes |
| Xiong 2018                | Yes | Yes |
| Xu et al. 2015            | Yes |     |
| Xu et al. 2009            | Yes |     |
| Yoon et al. 2009          | Yes |     |
| Yoshitake et al. 2015     | Yes |     |
| Zha et al. 2001           | Yes |     |
| Zhang et al. 2020         | Yes |     |

---

32 **Figure S1** Article selection process using Preferred Reporting Items for Systematic  
 33 Reviews (PRISMA) guidelines.

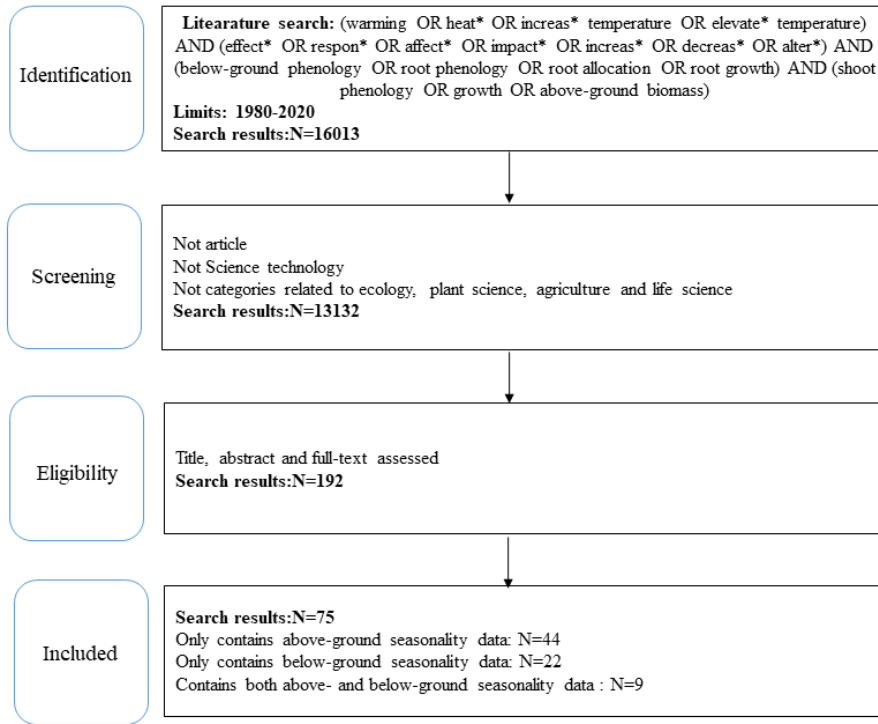

34  
 35

36 **References**

- 37 1. **Adams SR, Cockshull KE, Cave CRJ. 2001.** Effect of temperature on the growth and  
 38 development of tomato fruits. *Annals of Botany* **88**(5): 869-877.
- 39 2. **Arndal MF, Tolver A, Larsen KS, Beier C, Schmidt IK. 2018.** Fine root growth and vertical  
 40 distribution in response to elevated CO<sub>2</sub>, warming and drought in a mixed heathland–Grassland.  
 41 *Ecosystems* 2018(21): 15-30.
- 42 3. **Bai W, Wan S, Niu S, Liu W, Chen Q, Wang Q, Zhang W, Han X, Li L. 2010.** Increased  
 43 temperature and precipitation interact to affect root production, mortality, and turnover in a  
 44 temperate steppe: implications for ecosystem C cycling. *Global Change Biology* **16**(4): 1306-1316.
- 45 4. **Bannayan M, Soler CMT, Garcia AGY, Guerra LC, Hoogenboom G. 2009.** Interactive effects  
 46 of elevated CO<sub>2</sub> and temperature on growth and development of a short- and long-season peanut  
 47 cultivar. *Climatic Change* **93**: 389-406.
- 48 5. **Benlloch-González M, Quintero JM, Suarez MP, Sánchez-Lucas R, Fernández-Escobar R,  
 49 Benlloch M. 2016.** Effect of moderate high temperature on the vegetative growth and potassium  
 50 allocation in olive plants. *Journal of Plant Physiology* **207**: 22-29.
- 51 6. **Bronson DR, Gower ST, Tanner M, Van Herk I. 2009.** Effect of ecosystem warming on boreal  
 52 black spruce bud burst and shoot growth. *Global Change Biology* **15**(6): 1534-1543.
- 53 7. **Carrillo Y, Dijkstra FA, Dan LC, Morgan JA, Blumenthal D, Waldron S, Pendall E. 2014.**  
 54 Disentangling root responses to climate change in a semiarid grassland. *Oecologia* **175**(2): 699.
- 55 8. **Coleman JS, Bazzaz FA. 1992.** Effects of CO<sub>2</sub> and temperature on growth and resource use of co-  
 56 occurring C<sub>3</sub> and C<sub>4</sub> annuals. *Ecology* **73**(4): 1244-1259.
- 57 9. **D’Imperio, L., Arndal, M.F., Nielsen, C.S., Elberling, B. & Schmidt, I.K. (2018)** Fast responses  
 58 of root dynamics to increased snow deposition and summer air temperature in an arctic wetland.  
 59 *Frontiers in Plant Science*, **9**, 1258.
- 60 10. **Darrouzet-Nardi, A., Steltzer, H., Sullivan, P.F., Segal, A., Koltz, A.M., Livensperger, C.,  
 61 Schimel, J.P. & Weintraub, M.N. (2019)** Limited effects of early snowmelt on plants,  
 62 decomposers, and soil nutrients in Arctic tundra soils. *Ecology & Evolution*, **9**, 1820-1844.
- 63 11. **Edwards EJ, Benham DGM, Marland LA, Fitter AH. 2004.** Root production is determined by  
 64 radiation flux in a temperate grassland community. *Global Change Biology* **10**(2): 209-227.
- 65 12. **Esmail S, Oelbermann M. 2011.** The impact of climate change on the growth of tropical  
 66 agroforestry tree seedlings. *Agroforestry Systems* **83**(2): 235-244.
- 67 13. **Feng J, Xiong D, Deng F, Shi S, Xu S, Zhong B, Chen Y, Chen G. 2017.** Effects of soil warming  
 68 and precipitation exclusion and their interaction on fine roots production of Chinese fir  
 69 (*Cunninghamia lanceolata*) seedlings. *Acta Ecologica Sinica* **37**(4) 1119-1126.
- 70 14. **Fitter AH, Self GK, Brown TK, Bogie DS, Graves JD, Benham D, Ineson P. 1999.** Root  
 71 production and turnover in an upland grassland subjected to artificial soil warming respond to  
 72 radiation flux and nutrients, not temperature. *Oecologia* **120**(4): 575-581.
- 73 15. **Forbes PJ, Black KE, Hooker JE. 1997.** Temperature-induced alteration to root longevity in  
 74 *Lolium perenne*. *Plant & Soil* **190**(1): 87-90.
- 75 16. **Forbes, S.J., Cernusak, L.A., Northfield, T.D., Gleadow, R.M., Lambert, S. & Cheesman, A.W.  
 76 (2020)** Elevated temperature and carbon dioxide alter resource allocation to growth, storage and  
 77 defence in cassava (*Manihot esculenta*). *Environmental & Experimental Botany*, 103997.
- 78 17. **Gavito ME, Curtis PS, Mikkelsen TN, Jakobsen I. 2001.** Interactive effects of soil temperature,

- 79 atmospheric carbon dioxide and soil N on root development, biomass and nutrient uptake of winter  
 80 wheat during vegetative growth. *Journal of Experimental Botany* **52**(362): 1913-1923.
- 81 18. **Ge ZM, Zhou X, Kellomäki S, Peltola H, Biasi C, Shurpali N, Martikainen PJ, Wang KY.**  
 82 **2012.** Measured and modeled biomass growth in relation to photosynthesis acclimation of a  
 83 bioenergy crop (Reed canary grass) under elevated temperature, CO<sub>2</sub> enrichment and different water  
 84 regimes. *Biomass & Bioenergy* **46**(46): 251-262.
- 85 19. **Gruber A, Oberhuber W, Wieser G. 2018.** Nitrogen addition and understory removal but not soil  
 86 warming increased radial growth of *Pinus cembra* at treeline in the Central Austrian Alps. *Frontiers*  
 87 *in Plant Science* **9**: 1-11.
- 88 20. **Hakala, K. & Mela, T. (1996)** The effects of prolonged exposure to elevated temperatures and  
 89 elevated CO<sub>2</sub> levels on the growth, yield and dry matter partitioning of field-sown meadow fescue.  
 90 *Agricultural & Food Science*, **5**, 285-298.
- 91 21. **Han S, Lee SJ, Yoon TK, Han SH, Lee J, Kim S, Hwang J, Cho MS, Son YW. 2015.** Species-  
 92 specific growth and photosynthetic responses of first-year seedlings of four coniferous species to  
 93 open-field experimental warming. *Turkish Journal of Agriculture and Forestry* **39**(2): 342-349.
- 94 22. **Hely, S.E. & Roxburgh, S.H. (2005)** The interactive effects of elevated CO<sub>2</sub>, temperature and  
 95 initial size on growth and competition between a native C<sub>3</sub> and an invasive C<sub>3</sub> grass. *Plant Ecology*,  
 96 **177**, 85-98.
- 97 23. **Higuchi H, Sakuratani T, Utsunomiya N. 1999.** Photosynthesis, leaf morphology, and shoot  
 98 growth as affected by temperatures in cherimoya (*Annona cherimola* Mill.) trees. *Scientia*  
 99 *Horticulturae* **80**(1): 91-104.
- 100 24. **Huang BR, Taylor HM, McMichael BL. 1991.** Behavior of lateral roots in winter wheat as affected  
 101 by temperature. *Environmental & Experimental Botany* **31**(2): 187-192.
- 102 25. **Hutchison JS, Henry HAL. 2010.** Additive effects of warming and increased nitrogen deposition  
 103 in a temperate old field: plant productivity and the importance of winter. *Ecosystems* **13**(5): 661-  
 104 672.
- 105 26. **Johnson MG, Rygielwicz PT, Tingey DT, Phillips DL. 2010.** Elevated CO<sub>2</sub> and elevated  
 106 temperature have no effect on Douglas-fir fine-root dynamics in nitrogen-poor soil. *New Phytologist*  
 107 **170**(2): 345-356.
- 108 27. **Kellomäki, S. & Wang, K.-Y. (2001)** Growth and resource use of birch seedlings under elevated  
 109 carbon dioxide and temperature. *Annals of Botany*, **87**, 669-682.
- 110 28. **King J, Pregitzer K, Zak D. 1999.** Clonal variation in above- and below-ground growth responses  
 111 of *Populus tremuloides* Michaux: Influence of soil warming and nutrient availability. *Plant & Soil*  
 112 **217**(1/2): 119-130.
- 113 29. **Klein JA, Harte J, Zhao X-Q. 2007.** Experimental warming, not grazing, decreases rangeland  
 114 quality on the Tibetan Plateau. *Ecological Applications* **17**(2): 541-557.
- 115 30. **Kreyling, J., Grant, K., Hammerl, V., Arfin-Khan, M.A., Malyshev, A.V., Peñuelas, J., Pritsch,**  
 116 **K., Sardans, J., Schloter, M. & Schuerings, J. (2019)** Winter warming is ecologically more  
 117 relevant than summer warming in a cool-temperate grassland. *Scientific Reports*, **9**, 1-9.
- 118 31. **Lahti M, Aphalo PJ, Finer L, Ryyppo A, Lehto T, Mannerkoski H. 2005.** Effects of soil  
 119 temperature on shoot and root growth and nutrient uptake of 5-year-old Norway spruce seedlings.  
 120 *Tree Physiology* **25**(1): 115-122.
- 121 32. **Lee JS. 2011.** Combined effect of elevated CO<sub>2</sub> and temperature on the growth and phenology of  
 122 two annual C<sub>3</sub> and C<sub>4</sub> weedy species. *Agriculture Ecosystems & Environment* **140**(3): 484-491.



- 123 33. **Lenka, N.K., Lenka, S., Thakur, J., Elanchezhian, R., Aher, S., Simaiya, V., Yashona, D.,**  
 124 **Biswas, A., Agrawal, P. & Patra, A.** (2017) Interactive effect of elevated carbon dioxide and  
 125 elevated temperature on growth and yield of soybean. *Current Science*, **113**, 2305.
- 126 34. **Leppälammil-Kujansuu, J., Salemaa, M., Kleja, D.B., Linder, S. & Helmisaari, H.-S.** (2014)  
 127 Fine root turnover and litter production of Norway spruce in a long-term temperature and nutrient  
 128 manipulation experiment. *Plant & Soil*, **374**, 73-88.
- 129 35. **Li, Y., Hou, R. & Tao, F.** (2020) Interactive effects of different warming levels and tillage  
 130 managements on winter wheat growth, physiological processes, grain yield and quality in the North  
 131 China Plain. *Agriculture, Ecosystems & Environment*, **295**, 106923.
- 132 36. **Lin X, Zhang Z, Wang S, Hu Y, Xu G, Luo C, Chang X, Duan J, Lin Q, Xu B.** 2011. Response  
 133 of ecosystem respiration to warming and grazing during the growing seasons in the alpine meadow  
 134 on the Tibetan plateau. *Agricultural & Forest Meteorology* **151**(7): 792-802.
- 135 37. **Mitchell Rac, Mitchell Vj, Driscoll Sp, Franklin J, Lawlor Dw.** 1993. Effects of increased CO<sub>2</sub>  
 136 concentration and temperature on growth and yield of winter wheat at two levels of nitrogen  
 137 application. *Plant, Cell & Environment* **16**(5): 521-529.
- 138 38. **Nissinen K, Nybakken L, Virjamo V, Julkuentiitto R.** 2016. Slow-growing *Salix repens*  
 139 (*Salicaceae*) benefits from changing climate. *Environmental and Experimental Botany* **128**: 59-68.
- 140 39. **Nybakken L, Hörkkä R, Julkunen-Tiitto R.** 2012. Combined enhancements of temperature and  
 141 UVB influence growth and phenolics in clones of the sexually dimorphic *Salix myrsinifolia*.  
 142 *Physiologia Plantarum* **145**(4): 551-564.
- 143 40. **Oh-e I, Saitoh K, Kuroda T.** 2007. Effects of high temperature on growth, yield and dry-matter  
 144 production of rice grown in the paddy field. *Plant Production Science* **10**(4): 412-422.
- 145 41. **Peltola H, Kilpeläinen A, Kellomäki S.** 2002. Diameter growth of Scots pine (*Pinus sylvestris*)  
 146 trees grown at elevated temperature and carbon dioxide concentration under boreal conditions. *Tree*  
 147 *Physiology* **22**(14): 963-972.
- 148 42. **Pilon R, Picon-Cochard C, Bloor JMG, Revaillet S, Kuhn E, Falcimagne R, Balandier P,**  
 149 **Soussana J-F.** 2013. Grassland root demography responses to multiple climate change drivers  
 150 depend on root morphology. *Plant and Soil* **364**(1): 395-408.
- 151 43. **Pilumwong J, Senthong C, Srichuwong S, Ingram KT.** 2007. Effects of temperature and elevated  
 152 CO<sub>2</sub> on shoot and root growth of peanut (*Arachis hypogaea L.*) grown in controlled environment  
 153 chambers. *Scienceasia* **33**(1): 79-87.
- 154 44. **Radville L, Post E, Eissenstat DM.** 2018. On the sensitivity of root and leaf phenology to warming  
 155 in the Arctic. *Arctic Antarctic & Alpine Research* **50**(1): S100020.
- 156 45. **Randriamanana, T.R., Lavola, A. & Julkunen-Tiitto, R.** (2015) Interactive effects of  
 157 supplemental UV-B and temperature in European aspen seedlings: Implications for growth, leaf  
 158 traits, phenolic defense and associated organisms. *Plant Physiology & Biochemistry*, **93**, 84-93.
- 159 46. **Reddy KR, Hodges HF, Mckinion JM, Wall GW.** 1991. Temperature effects on pima cotton  
 160 growth and development. *Agronomy Journal* **84**(2): 237-243.
- 161 47. **Schuerings J, Jentsch A, Walter J, Kreyling J.** 2014. Winter warming pulses differently affect  
 162 plant performance in temperate heathland and grassland communities. *Ecological Research* **29**(4):  
 163 561-570.
- 164 48. **Sheppard CS, Stanley MC.** 2014. Does elevated temperature and doubled CO<sub>2</sub> increase growth of  
 165 three potentially invasive plants? *Invasive Plant Science & Management* **7**(2): 237-246.
- 166 49. **Shi SZ, Xiong DC, Deng F, Feng JX, Chen-Sen XU, Zhong BY, Chen YY, Chen GS, Yang YS.**

- 167        **2017.** Interactive effects of soil warming and nitrogen addition on fine root production of Chinese  
 168        fir seedlings. *Chinese Journal of Plant Ecology* **41**(2): 186-195.
- 169    50. **Slaney, M., Wallin, G., Medhurst, J. & Linder, S.** (2007) Impact of elevated carbon dioxide  
 170        concentration and temperature on bud burst and shoot growth of boreal Norway spruce. *Tree*  
 171        *Physiology*, **27**, 301-312.
- 172    51. **Sobuj N, Virjamo V, Zhang Y, Nybakken L, Julkuentiitto R.** **2018.** Impacts of elevated  
 173        temperature and CO<sub>2</sub> concentration on growth and phenolics in the sexually dimorphic *Populus*  
 174        *tremula* (L.). *Environmental and Experimental Botany* **146**: 34-44.
- 175    52. **Sønsteby A, Heide OM.** **2012.** Effects of photoperiod and temperature on growth, flowering and  
 176        fruit yield in annual-fruited red raspberry cultivars (*Rubus idaeus* L.). *European Journal of*  
 177        *Horticultural Science* **77**(3): 97-108.
- 178    53. **Stenström A, Jónsdóttir IS.** **2010.** Responses of the clonal sedge, *Carex bigelowii*, to two seasons  
 179        of simulated climate change. *Global Change Biology* **3**(S1): 89-96.
- 180    54. **Stirling CCM, Jones ML, Ashenden TW, Sparks TH.** **2010.** Effects of elevated CO<sub>2</sub> and  
 181        temperature on growth and allometry of five native fast-growing annual species. *New Phytologist*  
 182        **140**(2): 343-354.
- 183    55. **Sullivan, P.F. & Welker, J.M.** (2005) Warming chambers stimulate early season growth of an arctic  
 184        sedge: results of a minirhizotron field study. *Oecologia*, **142**, 616-626.
- 185    56. **Tacarindua CRP, Shiraiwa T, Homma K, Kumagai E, Sameshima R.** **2013.** The effects of  
 186        increased temperature on crop growth and yield of soybean grown in a temperature gradient  
 187        chamber. *Field Crops Research* **154**(3): 74-81.
- 188    57. **Takahashi K.** **2005.** Effects of artificial warming on shoot elongation of alpine dwarf pine (*pinus*  
 189        *pumila*) on mount shogigashira, central Japan. *Arctic Antarctic & Alpine Research* **37**(4): 620-625.
- 190    58. **Usami T, Lee JT.** **2010.** Interactive effects of increased temperature and CO<sub>2</sub> on the growth of  
 191        *Quercus myrsinaefolia* saplings. *Plant Cell & Environment* **24**(10): 1007-1019.
- 192    59. **Veteli TKK, Julkunen-Tiitto R, Roininen H, Tahvanainen J.** **2010.** Effects of elevated CO<sub>2</sub> and  
 193        temperature on plant growth and herbivore defensive chemistry. *Global Change Biology* **8**(12):  
 194        1240-1252.
- 195    60. **Volder A, Gifford RM, Evans JR.** **2015.** Effects of elevated atmospheric CO<sub>2</sub> concentrations,  
 196        clipping regimen and differential day/night atmospheric warming on tissue nitrogen concentrations  
 197        of a perennial pasture grass. *Global Change Biology* **7**: plv094.
- 198    61. **Walker, T.N., Ward, S.E., Ostle, N.J. & Bardgett, R.D.** (2015) Contrasting growth responses of  
 199        dominant peatland plants to warming and vegetation composition. *Oecologia*, **178**, 141-151.
- 200    62. **Wan SQ, Norby RJPregitzer KS, Ledford J, O'Neill EG.** **2004.** CO<sub>2</sub> enrichment and warming  
 201        of the atmosphere enhance both productivity and mortality of maple tree fine roots. *New Phytologist*  
 202        **162**(2): 437-446.
- 203    63. **Wang, C., Zhao, X., Zi, H., Hu, L., Ade, L., Wang, G. & Lerdau, M.** (2017) The effect of  
 204        simulated warming on root dynamics and soil microbial community in an alpine meadow of the  
 205        Qinghai-Tibet Plateau. *Applied Soil Ecology*, **116**, 30-41.
- 206    64. **Wang, J.-F., Gao, S., Lin, J.-X., Mu, Y.-G. & Mu, C.-S.** (2010) Summer warming effects on  
 207        biomass production and clonal growth of *Leymus chinensis*. *Crop & Pasture Science*, **61**, 670-676.
- 208    65. **Wang, Z., Ding, L., Wang, J., Zuo, X., Yao, S. & Feng, J.** (2016) Effects of root diameter, branch  
 209        order, root depth, season and warming on root longevity in an alpine meadow. *Ecological Research*,  
 210        **31**, 739-747.

- 211 66. **Wheeler JA, Gonzalez NM, Stinson KA. 2016.** Red hot maples: *Acer rubrum* first-year phenology  
212 and growth responses. *Canadian Journal of Forest Research* **47**(2): 159-165.
- 213 67. **Wu, Y., Zhu, B., Eissenstat, D.M., Wang, S., Tang, Y. & Cui, X. (2020)** Warming and grazing  
214 interact to affect root dynamics in an alpine meadow. *Plant & Soil*, 1-16.
- 215 68. **Xiong D. 2018.** Interactive effects of warming and nitrogen addition on fine root dynamics of a  
216 young subtropical plantation. *Soil Biology and Biochemistry* **123**: 180-189.
- 217 69. **Xu MH, Peng F, You QG, Guo J, Tian XF, Liu M, Xue X. 2015.** Effects of warming and clipping  
218 on plant and soil properties of an alpine meadow in the Qinghai-Tibetan Plateau, China. *Journal of*  
219 *Arid Land* **7**(2): 189-204.
- 220 70. **Xu, Z., Hu, T., Zhang, L., Zhang, Y., Xian, J. & Wang, K. (2009)** Effects of simulated warming  
221 on the growth, leaf phenology, and leaf traits of *Salix eriostachya* in sub-alpine timberline ecotone  
222 of western Sichuan, China. *The Journal of Applied Ecology*, **20**, 7-12.
- 223 71. **Yoon STH, Gerrit, Flitcroft I, Bannayan M. 2009.** Growth and development of cotton  
224 (*Gossypium hirsutum* L.) in response to CO<sub>2</sub> enrichment under two different temperature regimes.  
225 *Environmental & Experimental Botany* **67**(1): 178-187.
- 226 72. **Yoshitake S, Tabei N, Mizuno Y, Yoshida H, Sekine Y, Tatsumura M, Koizumi H. 2015.** Soil  
227 microbial response to experimental warming in cool temperate semi-natural grassland in Japan.  
228 *Ecological Research* **30**(2): 235-245.
- 229 73. **Tian, Y., Jin, C., Ai-Xing, D., Jian-Chu, Z. & Wei-Jian, Z. (2011)** Effects of asymmetric warming  
230 on the growth characteristics and yield components of winter wheat under free air temperature  
231 increased. *The Journal of Applied Ecology*, **22**, 681-686.
- 232 74. **Zha T, ., Ryyppö A, ., Wang KY, Kellomäki S, . 2001.** Effects of elevated carbon dioxide  
233 concentration and temperature on needle growth, respiration and carbohydrate status in field-grown  
234 Scots pines during the needle expansion period. *Tree Physiology* **21**(17): 1279-1287.
- 235 75. **Zhang, L., Zhong, B., Chen, T., Xiong, D., Yan, X. & Chen, G. (2020)** Effects of air and soil  
236 warming on aboveground phenology and growth of *Cunninghamia lanceolata* seedlings. *Acta*  
237 *Ecologica Sinica*. **40**, 4146-4156.

238

239

240

241

242

243

244

245

246

247

248
